# Supplementary material for: Antibacterial and Antiviral Effects of Ag, Cu and Zn Metals, Respective Nanoparticles and Filter Materials Thereof against Coronavirus SARS-CoV-2 and Influenza A Virus
Source: MDPI journal article supplement (doi:10.3390/pharmaceutics14122549), 2022-11-22
Supplement: s1 [file s1]

## **Supplementary material for:**

### **Antibacterial and antiviral effects of Ag, Cu, Zn metals, respective nanoparticles and filter materials thereof against coronavirus SARS-CoV-2 and influenza A virus**

Anna-Liisa Kubo, Kai Rausalu, Natalja Savest, Eva Žusinaite, Grigory Vasiliev, Mihkel Viirsalu, Tiia Plamus, Andres Krumme, Andres Merits, Olesja Bondarenko

**Table S1.** Dynamic light scattering (DLS) for evaluation of nanoparticles in suspensions for producing filter materials.

| Sample suspension                       | Time | NP                  | Solvent     | % of polymer | Hydro-Dynamic size, nm | PDI |
|-----------------------------------------|------|---------------------|-------------|--------------|------------------------|-----|
| 5%CuO_Ac:DMAc2:1                        | 24 h | CuO                 | Ac:DMAc 2:1 | -            | 254.5                  | 0.3 |
| 17%CA_5%CuO_Ac:DMAc2:1                  | 24 h | CuO                 | Ac:DMAc 2:1 | 17% CA       | 177.3                  | 0.7 |
| 5%CuO_Ac:DMAc2:1                        | 1 w  | CuO                 | Ac:DMAc 2:1 | -            | 221.8                  | 0.3 |
| 17%CA_5%CuO_Ac:DMAc2:1                  | 1 w  | CuO                 | Ac:DMAc 2:1 | 17% CA       | 195.5                  | 0.5 |
| 5%CuO-COOH_Ac:DMAc2:1                   | 24 h | CuO-COOH            | Ac:DMAc 2:1 | -            | 3990.7                 | 1.0 |
| 17%CA_5%CuO-COOH_Ac:DMAc2:1             | 24 h | CuO-COOH            | Ac:DMAc 2:1 | 17% CA       | 320.4                  | 0.4 |
| 5%CuO-COOH_Ac:DMAc2:1                   | 1 w  | CuO-COOH            | Ac:DMAc 2:1 | -            | 536.9                  | 0.7 |
| 17%CA_5%CuO-COOH_Ac:DMAc2:1             | 1 w  | CuO-COOH            | Ac:DMAc 2:1 | 17% CA       | 258.8                  | 0.3 |
| 5%CuO-NH <sub>2</sub> _Ac:DMAc2:1       | 24 h | CuO-NH <sub>2</sub> | Ac:DMAc 2:1 | -            | 715.4                  | 0.8 |
| 17%CA_5%CuO-NH <sub>2</sub> _Ac:DMAc2:1 | 24 h | CuO-NH <sub>2</sub> | Ac:DMAc 2:1 | 17% CA       | 144.0                  | 0.2 |
| 5%CuO-NH <sub>2</sub> _Ac:DMAc2:1       | 1 w  | CuO-NH <sub>2</sub> | Ac:DMAc 2:1 | -            | 394.3                  | 0.6 |
| 17%CA_5%CuO-NH <sub>2</sub> _Ac:DMAc2:1 | 1 w  | CuO-NH <sub>2</sub> | Ac:DMAc 2:1 | 17% CA       | 248.4                  | 0.1 |
| 5%CuO_Ac:DMAc3:1                        | 24 h | CuO                 | Ac:DMAc 3:1 | -            | 288.2                  | 0.5 |
| 17%CA_5%CuO_Ac:DMAc3:1                  | 24 h | CuO                 | Ac:DMAc 3:1 | 17% CA       | 189.9                  | 0.1 |
| 5%CuO_Ac:DMAc3:1                        | 1 w  | CuO                 | Ac:DMAc 3:1 | -            | 288.9                  | 0.4 |
| 17%CA_5%CuO_Ac:DMAc3:1                  | 1 w  | CuO                 | Ac:DMAc 3:1 | 17% CA       | 201.3                  | 0.1 |
| 5%CuO-COOH_Ac:DMAc3:1                   | 24 h | CuO-COOH            | Ac:DMAc 3:1 | -            | 10712.0                | 0.6 |
| 17%CA_5%CuO-COOH_Ac:DMAc3:1             | 24 h | CuO-COOH            | Ac:DMAc 3:1 | 17% CA       | 232.7                  | 0.4 |
| 5%CuO-COOH_Ac:DMAc3:1                   | 1 w  | CuO-COOH            | Ac:DMAc 3:1 | -            | 822.3                  | 0.8 |
| 17%CA_5%CuO-COOH_Ac:DMAc3:1             | 1 w  | CuO-COOH            | Ac:DMAc 3:1 | 17% CA       | 432.1                  | 0.3 |
| 5%CuO-NH <sub>2</sub> _Ac:DMAc3:1       | 24 h | CuO-NH <sub>2</sub> | Ac:DMAc 3:1 | -            | 492.0                  | 0.7 |
| 17%CA_5%CuO-NH <sub>2</sub> _Ac:DMAc3:1 | 24 h | CuO-NH <sub>2</sub> | Ac:DMAc 3:1 | 17% CA       | 199.6                  | 0.0 |
| 5%CuO-NH <sub>2</sub> _Ac:DMAc3:1       | 1 w  | CuO-NH <sub>2</sub> | Ac:DMAc 3:1 | -            | 424.5                  | 0.6 |
| 17%CA_5%CuO-NH <sub>2</sub> _Ac:DMAc3:1 | 1 w  | CuO-NH <sub>2</sub> | Ac:DMAc 3:1 | 17% CA       | 200.6                  | 0.3 |

NP- nanoparticle

w- week

DMAc- dimethyl acetamide

Ac -Acetone

PDI- polydispersity index

CA- cellulose acetate

**Table S2.** Operating parameters for electrospinning of the filter materials.

| Samples                         | Additive concentration | Solvent system | Pumping rate | Needle diameter | Distance | Voltage |
|---------------------------------|------------------------|----------------|--------------|-----------------|----------|---------|
|                                 | (% w/w)                |                | ml/h         | mm              | cm       | kV      |
| CA                              | -                      | Ac-DMAc (2:1)  | 0.6          | 0.4             | 15       | 10      |
| CA_7.5%CuSO <sub>4</sub>        | 7.5                    | Ac-DMAc (2:1)  | 0.9          | 0.6             | 15       | 10      |
| CA_10%CuO                       | 10                     | Ac-DMAc (2:1)  | 0.4          | 0.4             | 15       | 10      |
| CA_thymol                       | 10                     | Ac-DMAc (2:1)  | 0.4          | 0.4             | 15       | 10      |
| CA_thymol_7.5%CuSO <sub>4</sub> | 10                     | Ac-DMAc (2:1)  | 0.4          | 0.4             | 15       | 10      |

**Table S3.** Physicochemical properties characterization of nanoparticles in suspensions.

| Metal-based NPs or metal salts | Primary size, nm | Hydrodynamic diameter (Dh) in MQ water, nm (PDI) | Dh in RPMI cell culture medium, nm (PDI) | Z-potential in MQ water, mV | Z-potential in RPMI cell culture medium, mV | Metal content, % | Dissolution after 24h in RPMI cell culture medium, % |
|--------------------------------|------------------|--------------------------------------------------|------------------------------------------|-----------------------------|---------------------------------------------|------------------|------------------------------------------------------|
| CuO                            | 15.9 ± 5.2*      | 237 ± 31 (0.25)*                                 | 204 ± 13 (0.45)*                         | 27.5 ± 1.8*                 | - 10.8 ± 1.4*                               | 76.8 ± 5.7*      | 103 ± 0.5*                                           |
| CuO-NH <sub>2</sub>            | 6.9 ± 2.2*       | 733 ± 252 (0.24)*                                | 936 ± 229 (0.67)*                        | 25.8 ± 1.3*                 | - 8.9 ± 0.8*                                | 46.2 ± 4.0*      | 99.3 ± 0.8                                           |
| CuO-COOH                       | 9.2 ± 2.5*       | 1124 ± 128 (0.35)*                               | 303 ± 84 (0.70)*                         | - 12.0 ± 2.2*               | - 10.2 ± 0.8*                               | 33.6 ± 3.2*      | 98.9 ± 0.5                                           |
| CuSO <sub>4</sub>              | na               | na                                               | na                                       | na                          | na                                          | 37.1 ± 4.5*      | 102.9 ± 0.3                                          |
| Ag-col                         | 12.5 ± 4**       | 45.88 ± 0.21 (0.261)                             | 61.2 ± 0.47 (0.24)                       | -56.6 ± 1.91                | -9.76 ± 0.84                                | 83.0 ± 9.8       | 5.24 ± 0.41                                          |
| nAg                            | 85.7 ± 29.3      | 109.4 ± 1.3 (0.447)                              | 156 ± 3.15 (0.403)                       | -27.7 ± 1.65                | -10.49 ± 0.93                               | 71.8 ± 12.0      | 1.1 ± 0.32                                           |
| AgNO <sub>3</sub>              | na               | na                                               | na                                       | na                          | Na                                          | 70.2 ± 7.95      | 96.7 ± 6.3                                           |

\* Characterization of NPs has been done previously by *Kubo and al* (Kubo et al. 2020)

\*\* Characterization of NPs has been done previously by *Blinova and al* (Blinova et al. 2013)

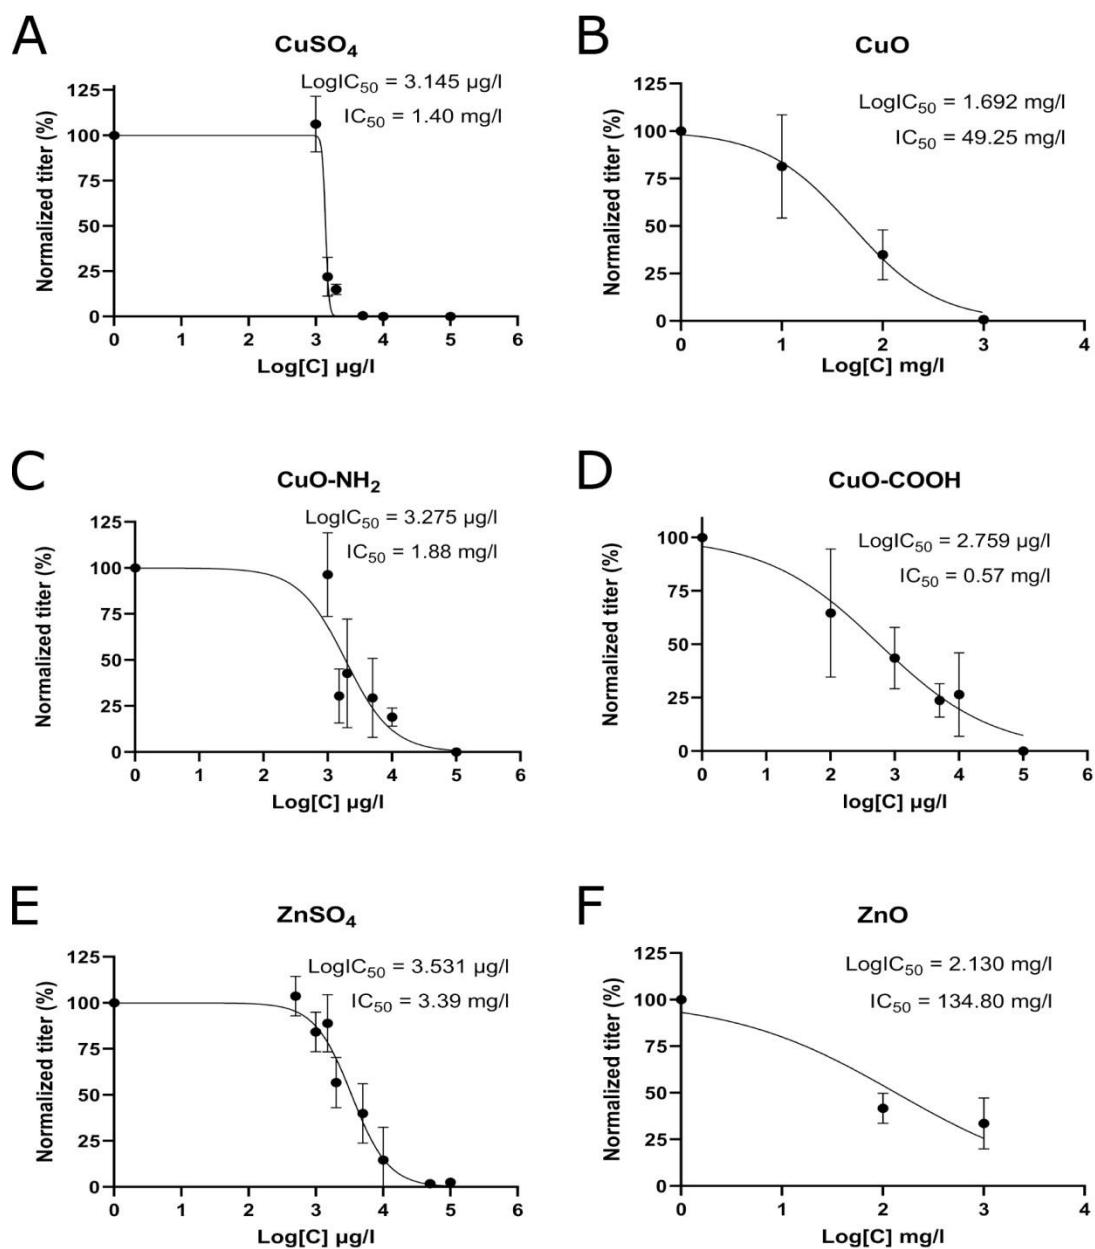

**Figure S1.** Antiviral properties of metal compounds against A/WSN/1933 (H1N1) virus in water suspensions. Note the differences in units (concentration of CuO and ZnO is shown in mg/l).

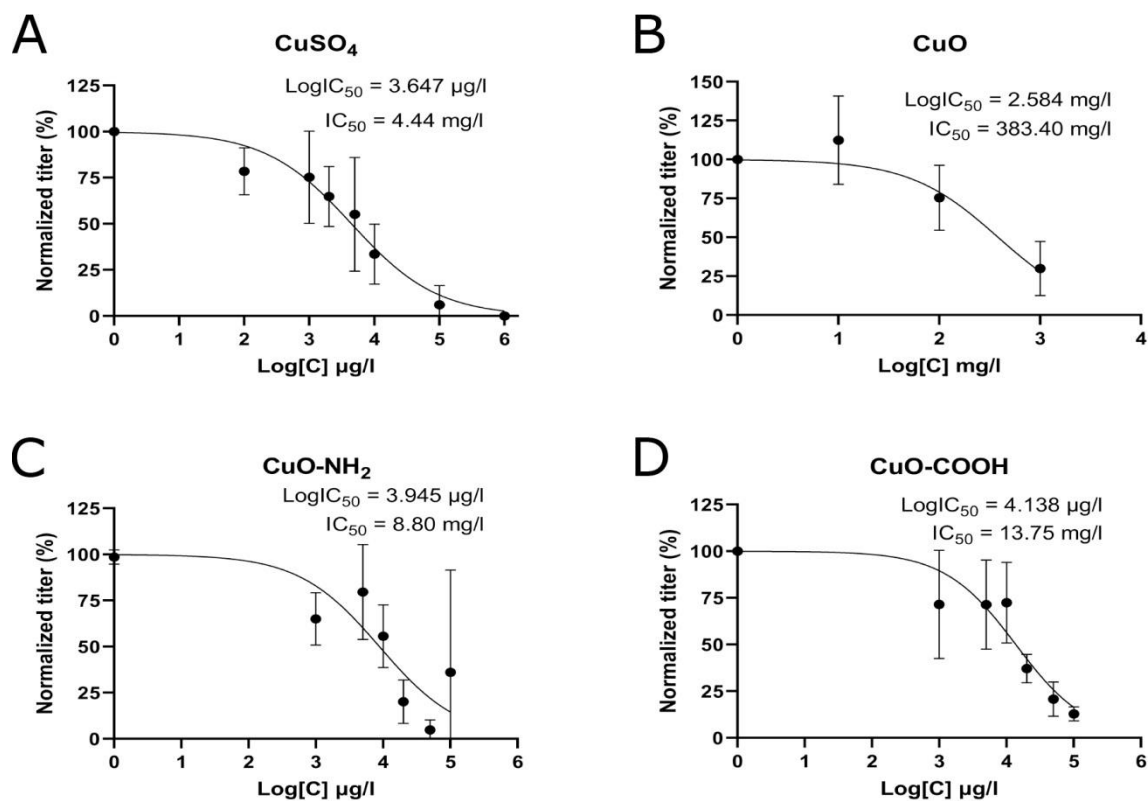

**Figure S2.** Antiviral properties of metal compounds against TGEV virus in water suspensions. Note the differences in units.

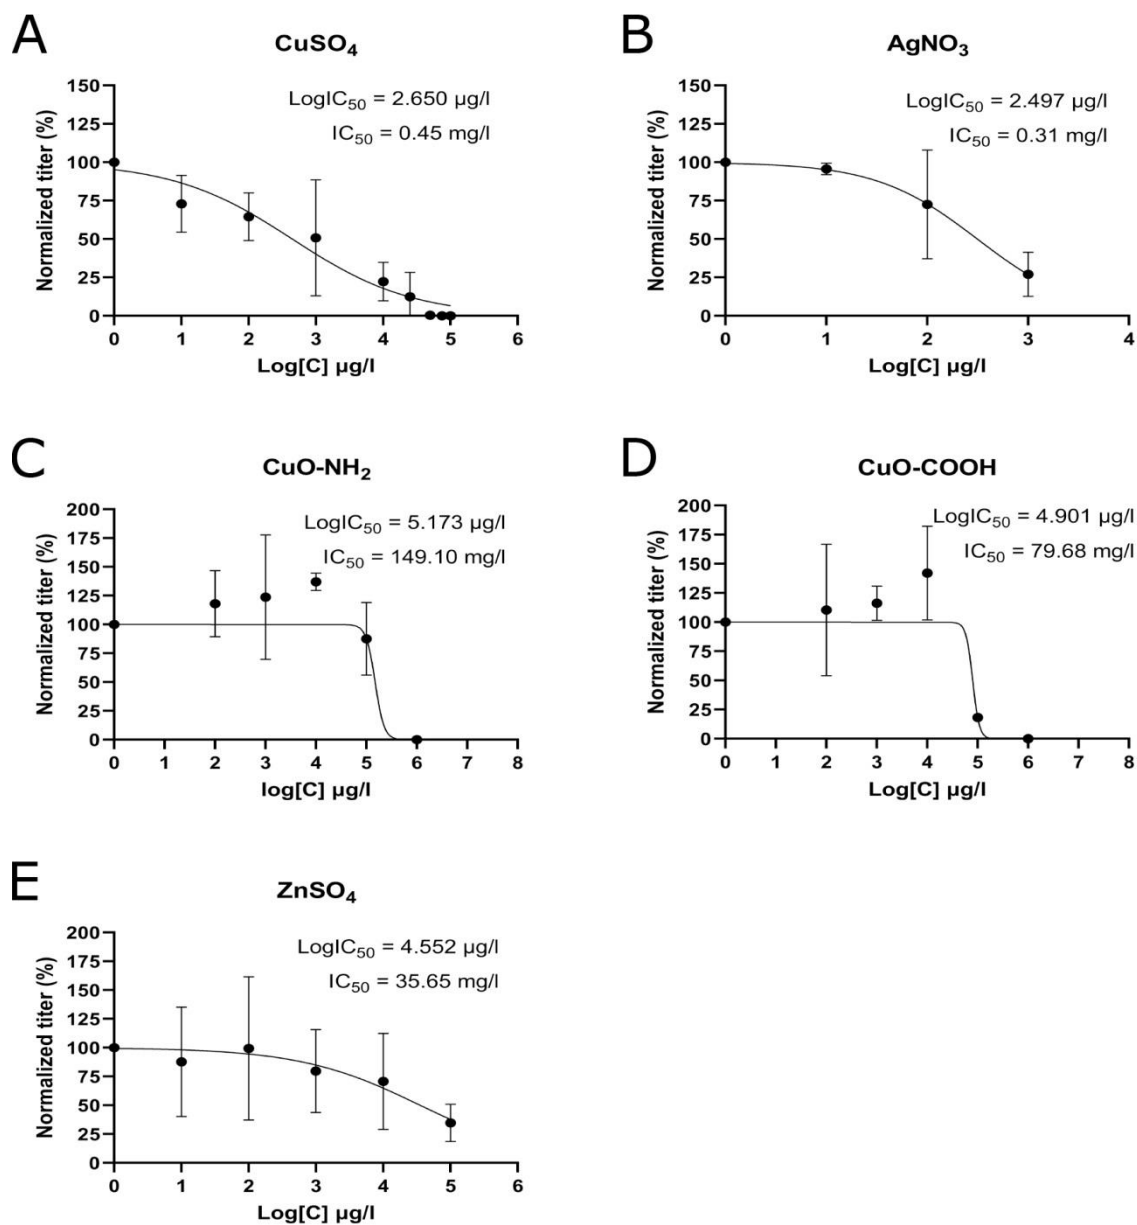

**Figure S3.** Antiviral properties of metal compounds against SARS-CoV-2 virus (Estonian strain 3049) in water suspensions.

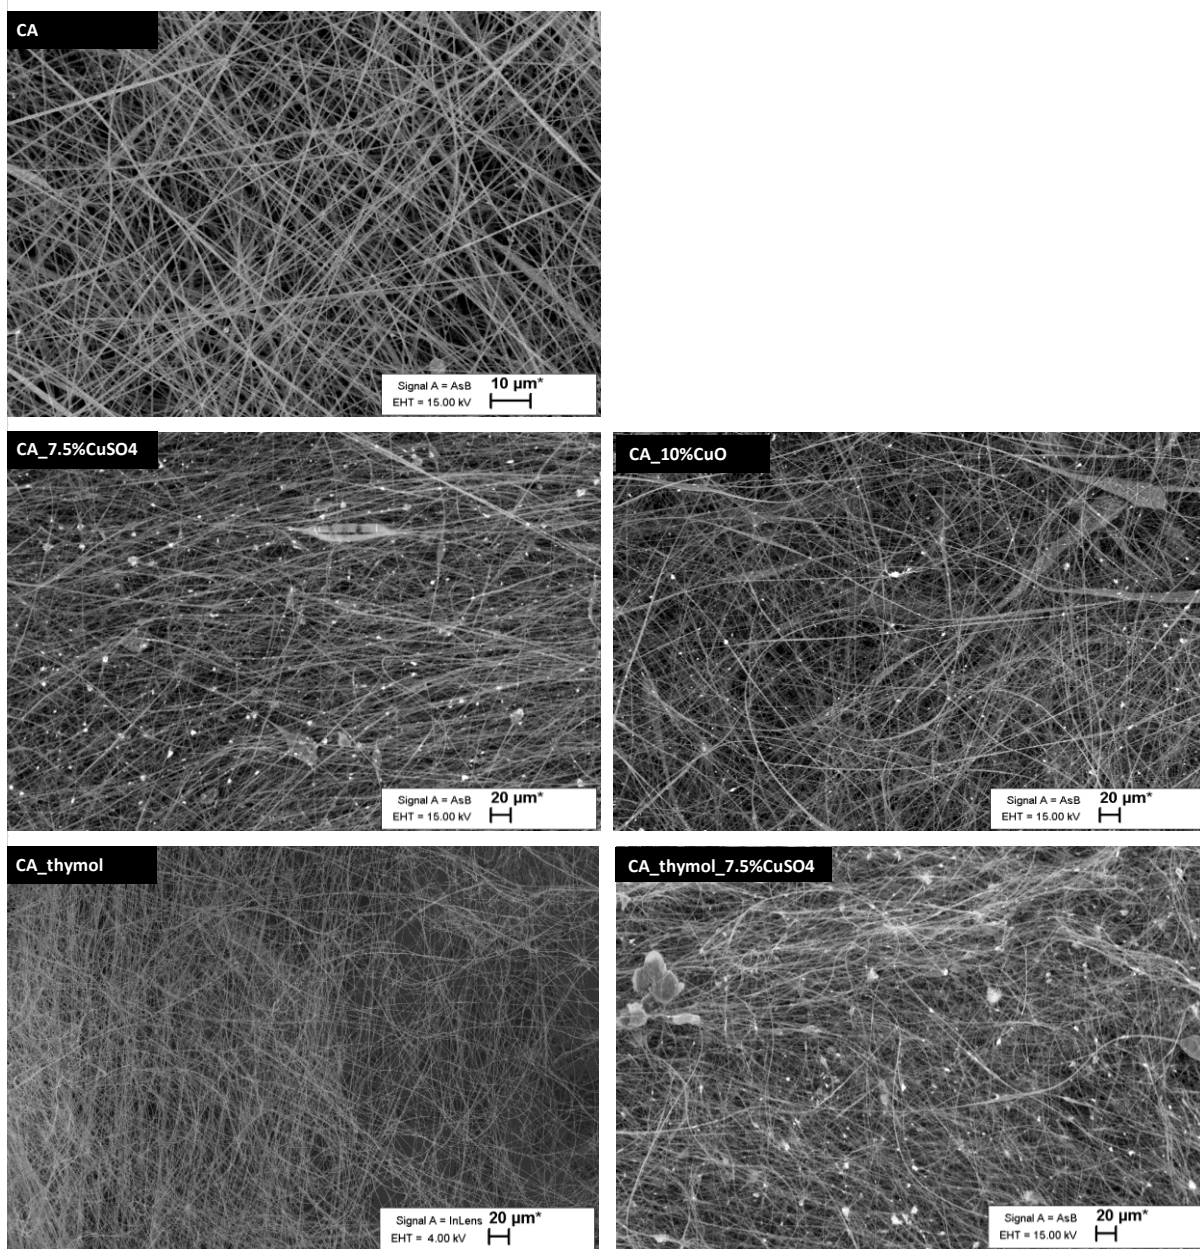

**Figure S4.** Scanning electron micrograph of CA fibers.

### Literature for SM

Kubo AL, Vasiliev G, Vija H, et al (2020) Surface carboxylation or PEGylation decreases CuO nanoparticles' cytotoxicity to human cells in vitro without compromising their antibacterial properties. *Arch Toxicol* 94:1561–1573. <https://doi.org/10.1007/s00204-020-02720-7>

Blinova I, Niskanen J, Kajankari P, et al (2013) Toxicity of two types of silver nanoparticles to aquatic crustaceans *Daphnia magna* and *Thamnocephalus platyurus*. *Environ Sci Pollut Res* 20:3456–3463. <https://doi.org/10.1007/s11356-012-1290-5>
